# Supplementary material for: Genes involved in muscle contractility and nutrient signaling pathways within celiac disease risk loci show differential mRNA expression
Source: PubMed Central journal article supplement (PMC4630939; doi:10.1186/s12881-015-0190-1), 2015-06-30

### Target gene selection 1

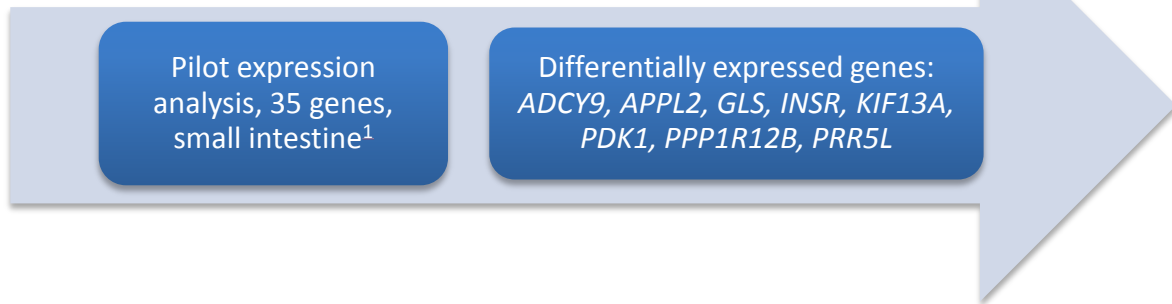

### Target gene selection 2

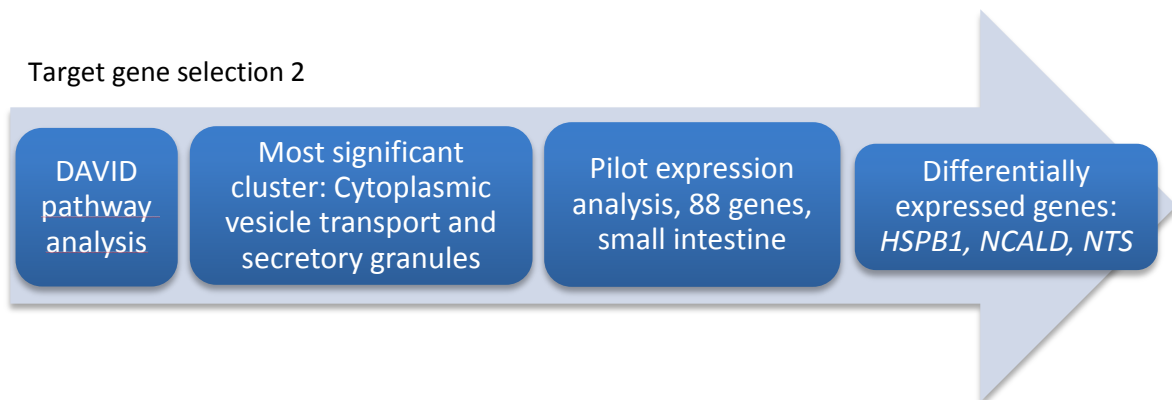

Supplement: 12881_2015_190_MOESM1_ESM.pdf [file 12881_2015_190_MOESM1_ESM.pdf]
